# Supplementary material for: Nitrogen-doped ordered mesoporous carbon single crystals: aqueous organic–organic self-assembly and superior supercapacitor performance
Source: Royal Society of Chemistry journal article supplement (doi:10.1039/c5ta06129f), 2015-01-01
Supplement: c5ta06129f1.pdf [file c5ta06129f1.pdf]

## Electronic Supplementary Information

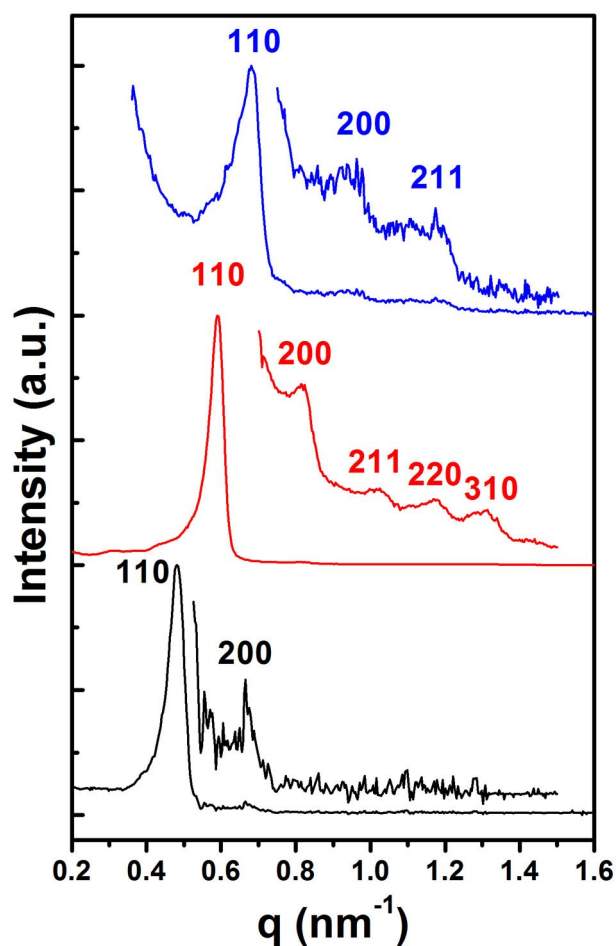

**Figure S1.** SAXS patterns of NOMC-as (black line), NOMC-H<sub>2</sub>O-350 (red line), and NOMC-H<sub>2</sub>O-600 (blue line).

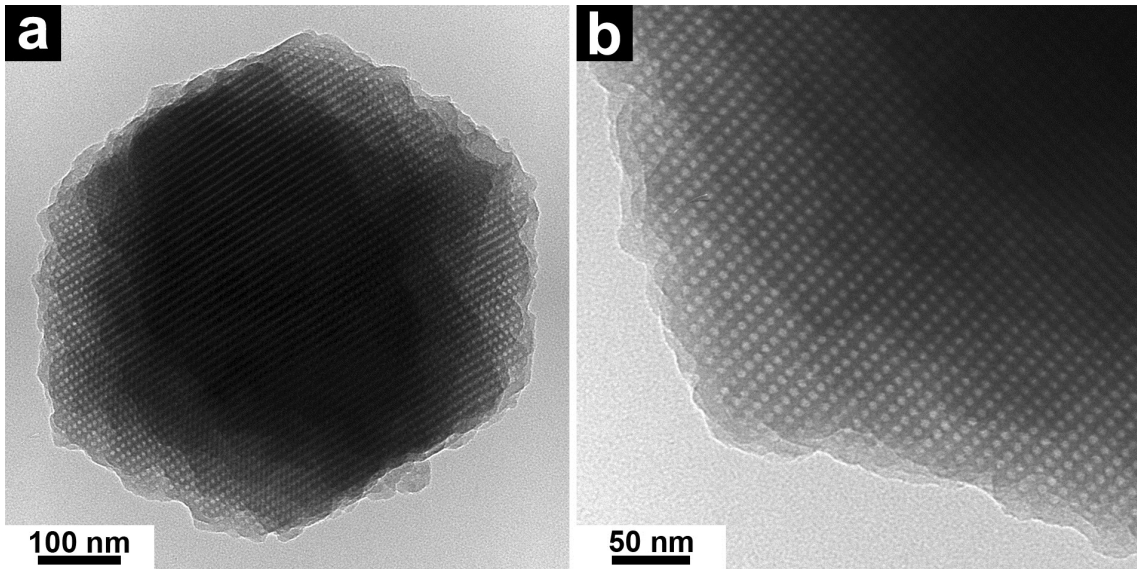

**Figure S2.** TEM images of NOMC-H<sub>2</sub>O-350.

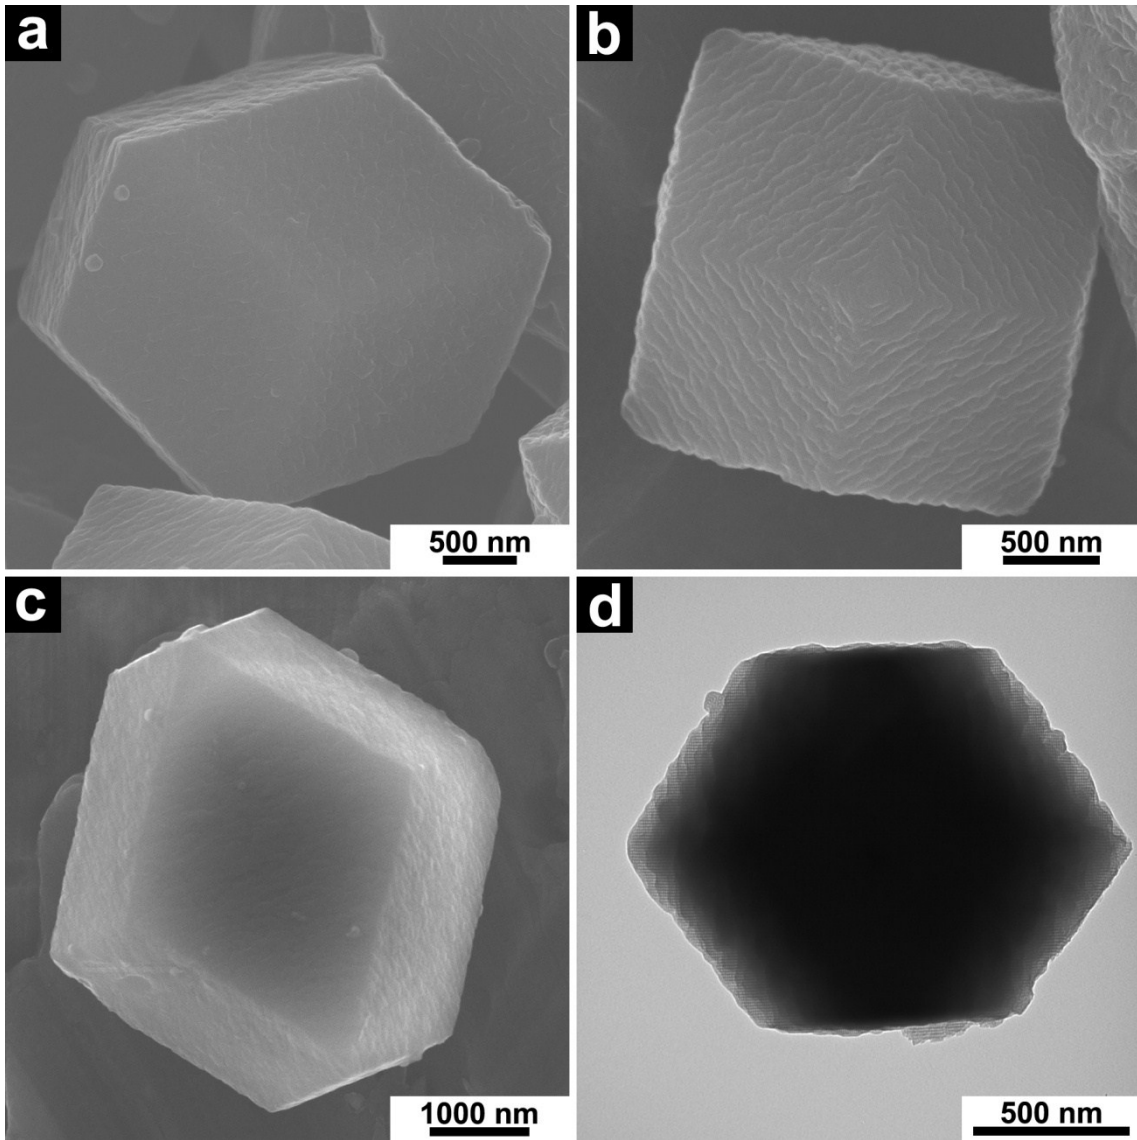

**Figure S3.** SEM and TEM images of NOMC-H<sub>2</sub>O-600.

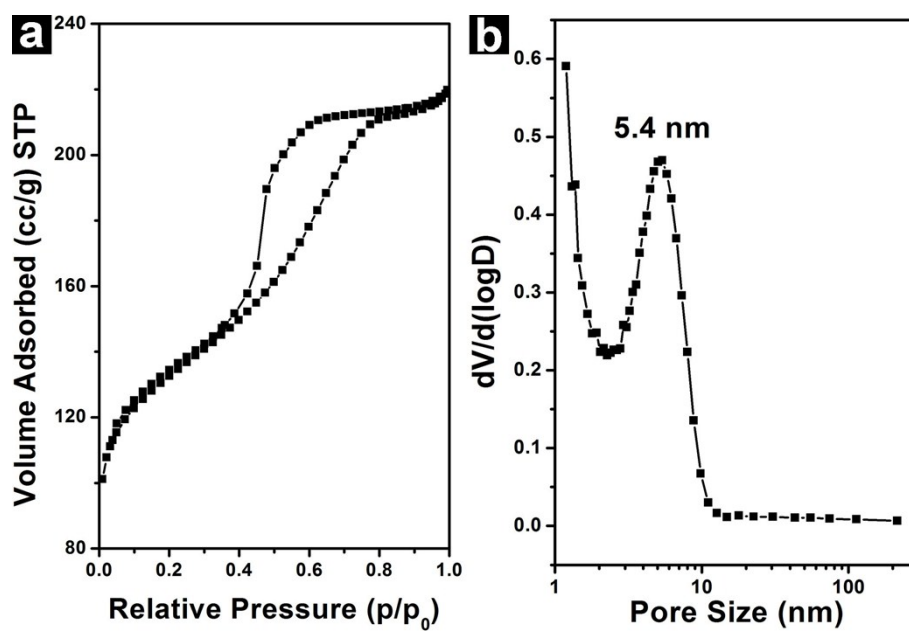

**Figure S4.**  $N_2$  adsorption-desorption isotherms (a) and the corresponding pore size distributions (b) of NOMC- $H_2O$ -600.

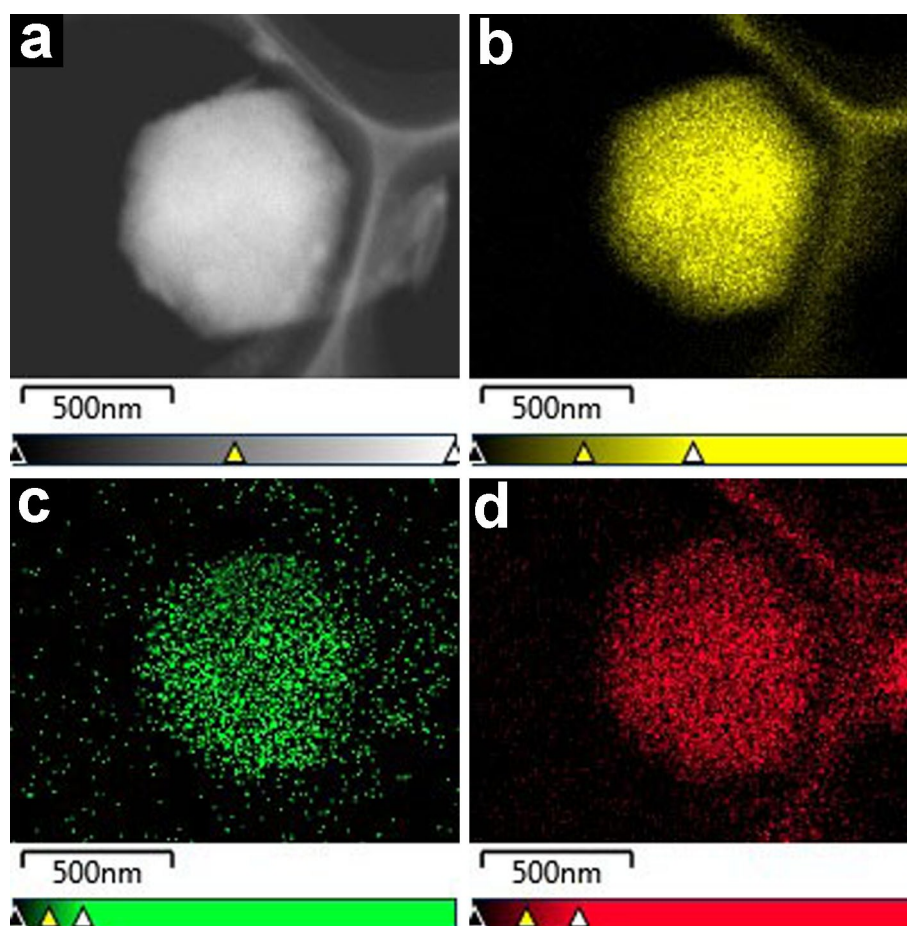

**Figure S5.** STEM image (a) of a NOMC-H<sub>2</sub>O-800 crystal and the corresponding C (b), N (c), and O (d) element maps.

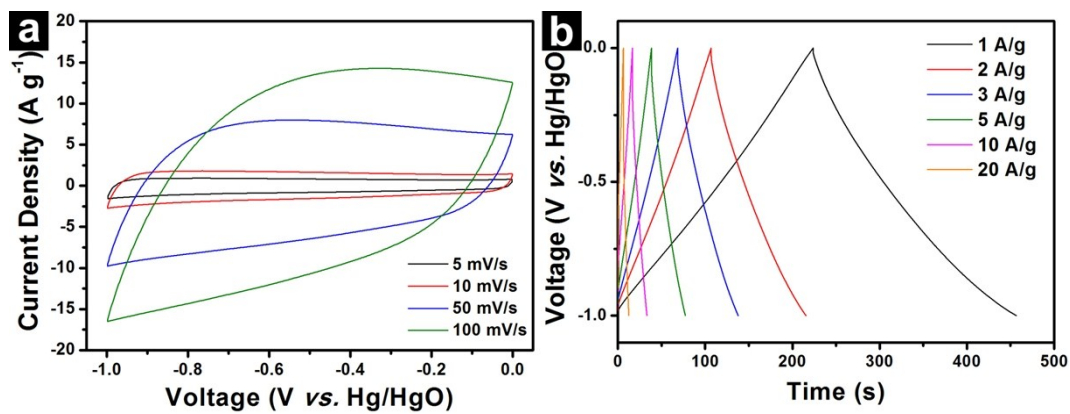

**Figure S6.** CV profiles and charge-discharge curves of NOMC-H<sub>2</sub>O-600.

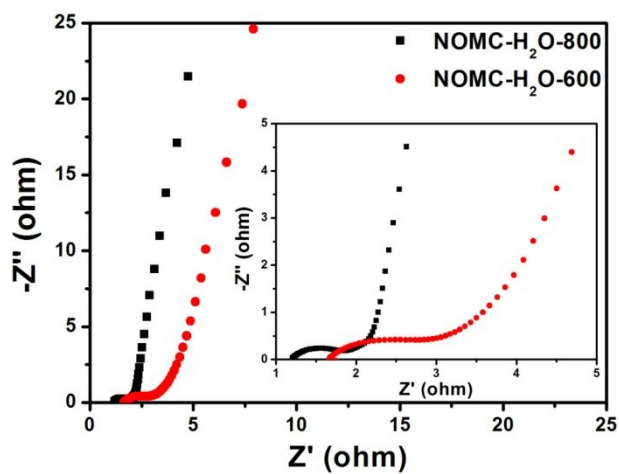

**Figure S7.** Nyquist plot of NOMC-H<sub>2</sub>O-800 and NOMC-H<sub>2</sub>O-600 in 6 M KOH solution.
